# Supplementary material
Source: Springer Nature journal article supplement (https://www.springermedizin.de/resource/supplementary/12885_2011_3098_MOESM9_ESM.pdf/9463230)

A

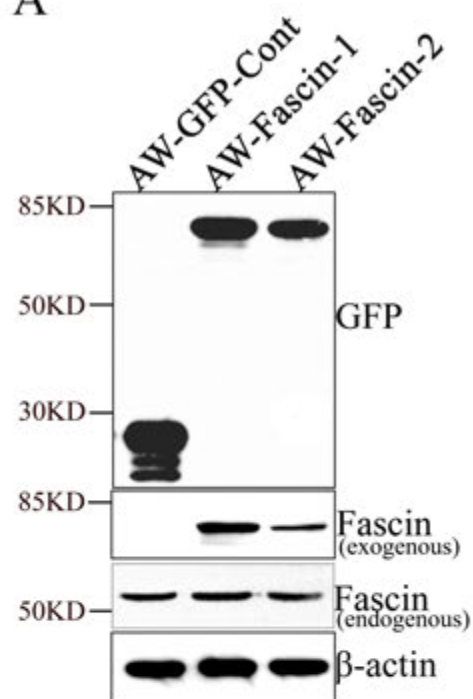

B

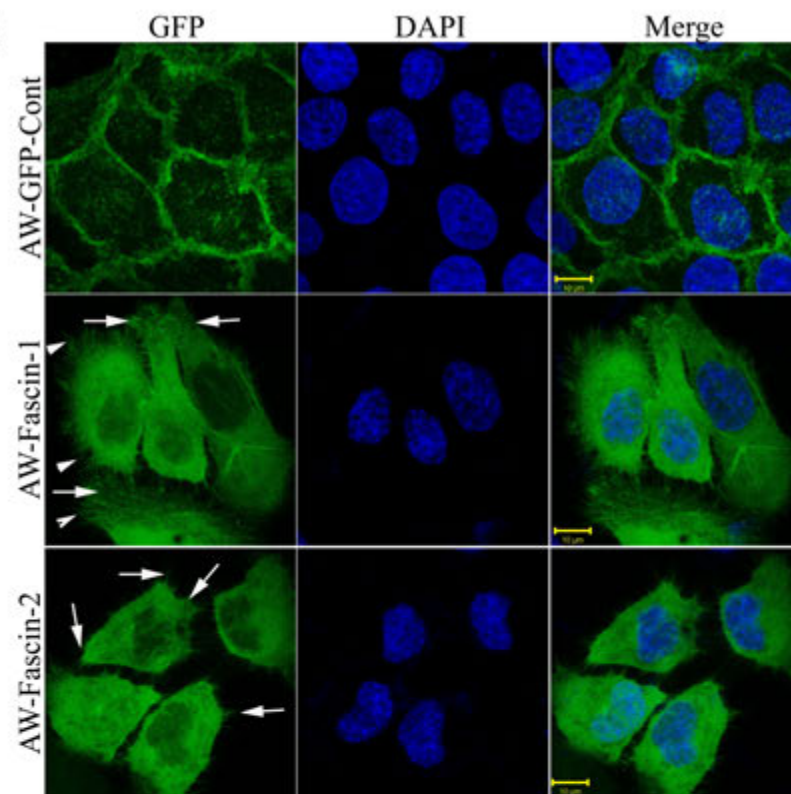

D

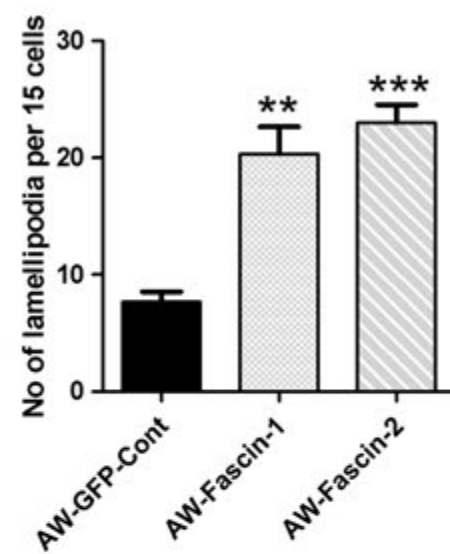

C

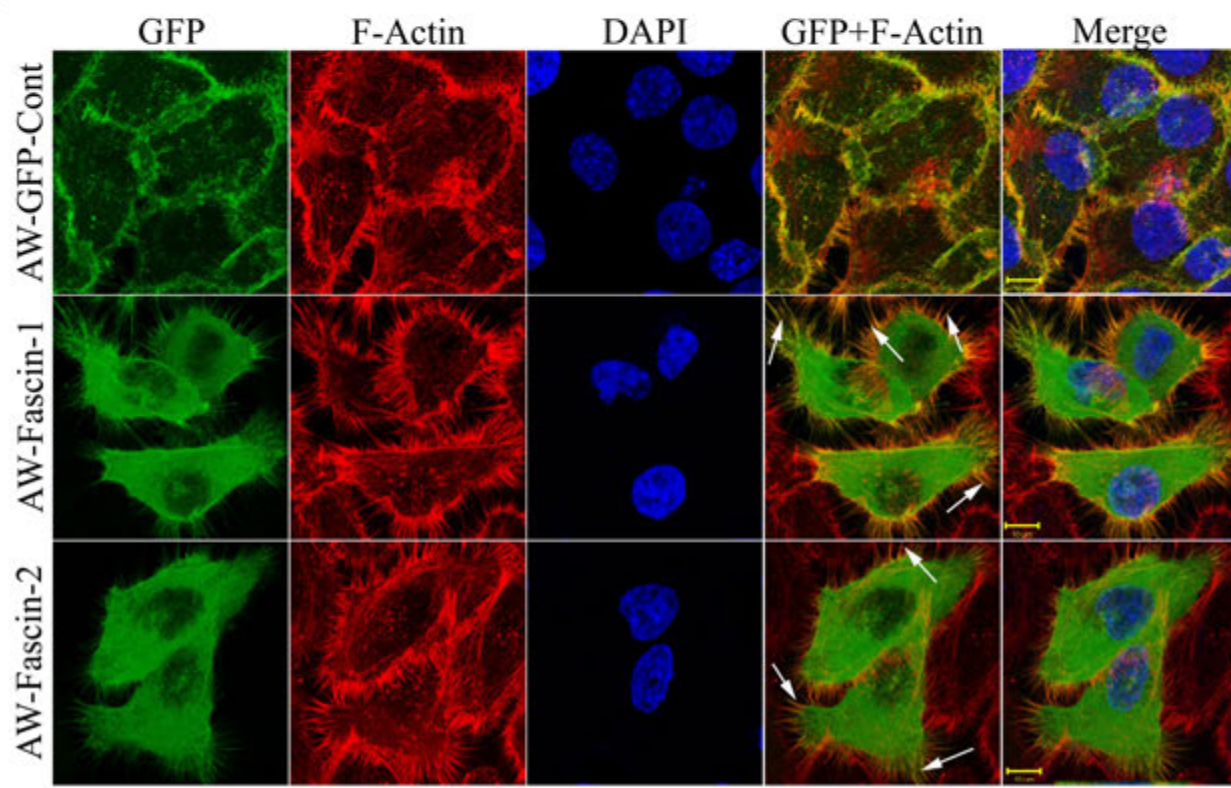

E

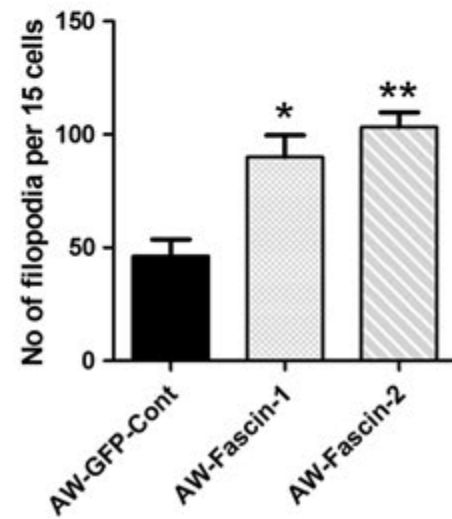

Supplement: MOESM9 [file 9463230]
